# Supplementary material for: Prognostic value of cardiac biomarkers and National Early Warning Score 2 in acute dyspnoea
Source: HighWire-hosted journal article supplement (doi:10.1136/openhrt-2021-001938), 2022-04-01

## **Prognostic Value of Cardiac Biomarkers and National Early Warning Score 2 in Acute Dyspnea**

Kristian Berge MD<sup>1,2</sup>; Jon Brynildsen MD, PhD<sup>1,2</sup>; Ragnhild Røysland MD, PhD<sup>2,3</sup>; Heidi Strand MSc<sup>3</sup>; Geir Christensen MD, PhD, MHA<sup>2,4</sup>; Arne Didrik Høiseth MD, PhD<sup>1,2</sup>; Torbjørn Omland MD, PhD, MPH<sup>1,2</sup>; Helge Røsjø MD, PhD<sup>2,5</sup>; Magnus Nakrem Lyngbakken MD, PhD<sup>1,2</sup>

<sup>1</sup>Department of Cardiology, Division of Medicine, Akershus University Hospital, Lørenskog, Norway; <sup>2</sup>Institute of Clinical Medicine, University of Oslo, Oslo, Norway; <sup>3</sup>Multidisciplinary Laboratory Medicine and Medical Biochemistry, Akershus University Hospital, Lørenskog, Norway; <sup>4</sup>Institute for Experimental Medical Research, Oslo University Hospital and University of Oslo, Oslo, Norway; <sup>5</sup>Division of Research and Innovation, Akershus University Hospital, Lørenskog, Norway.

### **SUPPLEMENTARY TABLES AND FIGURES**

**Supplementary Table 1:** Baseline characteristics HF subgroups (n=143)<sup>a</sup>

|               | <b>HF</b><br><b>n=143</b> | <b>HF<sub>rEF</sub></b><br><b>n=91</b> | <b>HF<sub>pEF</sub></b><br><b>n=52</b> | <b>p</b> |
|---------------|---------------------------|----------------------------------------|----------------------------------------|----------|
| Age           | 78 (68-83)                | 74 (66-81)                             | 81 (75-85)                             | 0.003    |
| Male sex      | 90 (63%)                  | 69 (76%)                               | 21 (40%)                               | <0.001   |
| BMI           | 27 (22-29)                | 27 (22-29)                             | 27 (23-30)                             | 0.47     |
| Smoking       | 30 (21%)                  | 23 (25%)                               | 7 (13%)                                | 0.095    |
| NYHA class IV | 65 (45%)                  | 42 (46%)                               | 23 (44%)                               | 0.82     |
| History of:   |                           |                                        |                                        |          |
| HF            | 87 (61%)                  | 72 (79%)                               | 15 (29%)                               | <0.001   |
| AF            | 68 (48%)                  | 45 (49%)                               | 23 (44%)                               | 0.55     |
| COPD          | 61 (43%)                  | 38 (42%)                               | 23 (44%)                               | 0.77     |
| CAD           | 78 (55%)                  | 62 (68%)                               | 16 (31%)                               | <0.001   |
| HT            | 69 (48%)                  | 39 (43%)                               | 30 (58%)                               | 0.088    |
| DM            | 43 (30%)                  | 29 (32%)                               | 14 (27%)                               | 0.54     |
| NEWS2 score   | 5 (3-7)                   | 5 (3-7)                                | 6 (3-8)                                | 0.34     |
| hs-cTnT       | 38 (22-75)                | 35 (23-74)                             | 39 (19-96)                             | 0.79     |
| NT-proBNP     | 3600 (1601-8396)          | 4308 (2064-8738)                       | 2293 (704-4536)                        | <0.001   |
| CRP           | 13 (5-37)                 | 13 (5-30)                              | 17 (6-40)                              | 0.26     |
| eGFR          | 66 (47-81)                | 67 (45-81)                             | 63 (47-82)                             | 0.90     |

BMI, Body mass index; NYHA, New York Heart Association; HF, heart failure; AF, atrial fibrillation; COPD, chronic obstructive pulmonary disease; CAD, coronary artery disease; HT, hypertension; DM, diabetes mellitus; CRP, C-reactive protein; eGFR, estimated glomerular filtration rate.

<sup>a</sup> Data are presented as n (%) or median (Q1-Q3).

**Supplementary Table 2:** Heart failure medication at discharge

|               | <b>HF</b><br><i>n=143</i> | <b>HFrEF</b><br><i>n=91</i> | <b>HFpEF</b><br><i>n=52</i> | <i>p</i> |
|---------------|---------------------------|-----------------------------|-----------------------------|----------|
| Beta blocker  | 108 (76%)                 | 75 (82%)                    | 33 (63%)                    | 0.011    |
| ACEi/ARB      | 95 (66%)                  | 66 (73%)                    | 29 (56%)                    | 0.041    |
| MRA           | 25 (17%)                  | 15 (16%)                    | 10 (19%)                    | 0.68     |
| Loop diuretic | 105 (73%)                 | 71 (78%)                    | 34 (65%)                    | 0.10     |
| Tiazid        | 13 (9%)                   | 8 (9%)                      | 5 (10%)                     | 0.87     |
| Digitalis     | 31 (22%)                  | 22 (24%)                    | 9 (17%)                     | 0.34     |

ACEi, Angiotensin-converting enzyme inhibitor; ARB, angiotensin receptor blocker; MRA, mineralocorticoid receptor antagonist.

**Supplementary Table 3:** Variables associated with NEWS2 (n=314)

|                                                                                         | <i>B</i> | <i>95% CI</i>  |
|-----------------------------------------------------------------------------------------|----------|----------------|
| <b><i>Univariate linear regression</i></b>                                              |          |                |
| Age                                                                                     | 0.036    | 0.013 - 0.060  |
| Male sex                                                                                | -0.366   | -1.032 - 0.300 |
| BMI                                                                                     | -0.041   | -0.087 - 0.005 |
| Smoking                                                                                 | -0.250   | -0.999 - 0.498 |
| NYHA class IV                                                                           | 1.934    | 1.298 - 2.570  |
| <i>History of:</i>                                                                      |          |                |
| HF                                                                                      | 0.058    | -0.655 - 0.771 |
| AF                                                                                      | 0.237    | -0.487 - 0.961 |
| COPD                                                                                    | 1.231    | 0.582 - 1.881  |
| CAD                                                                                     | -0.286   | -0.980 - 0.408 |
| HT                                                                                      | 0.806    | 0.129 - 1.483  |
| DM                                                                                      | 0.426    | -0.378 - 1.230 |
| lnhs-cTnT                                                                               | 0.685    | 0.413 - 0.956  |
| lnNT-proBNP                                                                             | 0.327    | 0.153 - 0.501  |
| lnCRP                                                                                   | 0.602    | 0.383 - 0.820  |
| lneGFR                                                                                  | -0.312   | -1.073 - 0.449 |
| <b><i>Multivariable linear regression (backward selection) (r<sup>2</sup>=0.20)</i></b> |          |                |
| lnCRP                                                                                   | 0.485    | 0.278 - 0.692  |
| NYHA class IV                                                                           | 1.327    | 0.687 - 1.967  |
| History of COPD                                                                         | 0.672    | 0.054 - 1.290  |
| lnhs-cTnT                                                                               | 0.456    | 0.195 - 0.717  |

Abbreviations as described in Supplementary Table 1.

**Supplementary Table 4:** NEWS2 variables for AHF, HFrEF and HFpEF

| <i>Variable</i>                    | <i>AHF</i><br><i>n=143</i> | <i>HFrEF</i><br><i>n=91</i> | <i>HFpEF</i><br><i>n=52</i> | <i>p</i> |
|------------------------------------|----------------------------|-----------------------------|-----------------------------|----------|
| Respiratory rate (per minute)      | 24 (18-28)                 | 23 (18-28)                  | 24 (20-30)                  | 0.45     |
| O <sub>2</sub> saturation (%)      | 94 (90-97)                 | 95 (91-97)                  | 92 (89-95)                  | 0.005    |
| Supplemental O <sub>2</sub> (n, %) | 64 (45%)                   | 41 (45%)                    | 23 (44%)                    | 0.92     |
| Systolic blood pressure (mmHg)     | 144 (123-166)              | 142 (119-171)               | 147 (129-165)               | 0.70     |
| Heart rate (beats per minute)      | 88 (74-109)                | 88 (76-109)                 | 89 (72-108)                 | 0.74     |
| Altered mental state (n, %)        | 0 (0%)                     | 0 (0%)                      | 0 (0%)                      | -        |
| Temperature (°C)                   | 36.8 (36.4-37.3)           | 36.8 (36.3-37.1)            | 37.0 (36.5-37.3)            | 0.029    |
| NEWS2                              | 5 (3-7)                    | 5 (3-7)                     | 6 (3-8)                     | 0.34     |

Data are presented as n (%), or median (Q1-Q3) and compared using the Mann-Whitney U test.

**Supplementary Table 5:** Spearman's correlations between NEWS2 parameters and hs-cTnT/NT-proBNP

|                         | <i>Hs-cTnT<br/>Corr.coeff.</i> | <i>p</i> | <i>NT-proBNP<br/>Corr.coeff.</i> | <i>p</i> |
|-------------------------|--------------------------------|----------|----------------------------------|----------|
| Respiratory rate        | 0.244                          | <0.001   | 0.167                            | <0.001   |
| Saturation              | -0.040                         | 0.08     | -0.046                           | 0.045    |
| Supplemental O2         | 0.166                          | <0.001   | 0.172                            | <0.001   |
| Systolic blood pressure | 0.069                          | 0.003    | 0.063                            | 0.007    |
| Heart rate              | 0.029                          | 0.214    | 0.007                            | 0.76     |
| Altered mental state    | -                              | -        | -                                | -        |
| Temperature             | 0.008                          | 0.74     | -0.066                           | 0.004    |
| NEWS2                   | 0.285                          | <0.001   | 0.197                            | <0.001   |

**Supplementary Table 6:** Hazard ratios for mortality in different prognostic models

| <i>Model</i> | <i>Variables</i>                                                      | <i>HR (95% CI)<br/>Unadjusted</i> | <i>p<sup>a</sup></i> | <i>HR (95% CI)<br/>Adjusted</i> | <i>p<sup>a</sup></i> |
|--------------|-----------------------------------------------------------------------|-----------------------------------|----------------------|---------------------------------|----------------------|
| 1            | Elevated NEWS2 clinical risk*                                         | 2.74 (1.66-4.51)                  | <0.001               | 2.11 (1.28-3.48) <sup>b</sup>   | 0.034                |
| 2            | Elevated NEWS2 clinical risk, hs-cTnT and/or NT-proBNP above median** | 5.64 (2.45-12.97)                 |                      |                                 |                      |
| 3            | Respiratory rate, per minute                                          | 1.06 (1.04-1.09)                  |                      | 1.06 (1.04-1.09) <sup>c</sup>   |                      |
| 4            | SpO2                                                                  | 0.96 (0.94-0.99)                  |                      |                                 |                      |
| 5            | Supplemental O2                                                       | 1.07 (1.00-1.15)                  |                      |                                 |                      |
| 6            | Systolic Blood Pressure                                               | 0.99 (0.98-1.00)                  |                      | 0.99 (0.98-0.99) <sup>d</sup>   |                      |
| 7            | Heart Rate                                                            | 1.00 (0.99-1.01)                  |                      |                                 |                      |
| 8            | Altered mental state                                                  | 1.00 (-.)                         |                      |                                 |                      |
| 9            | Temperature                                                           | 0.89 (0.70-1.13)                  |                      |                                 |                      |

\* Compared to low NEWS2 clinical risk

\*\* Compared to low NEWS2 clinical risk and both cardiac biomarkers below median

<sup>a</sup> *p* for trend

<sup>b</sup> Adjusted for age, BMI, hs-cTnT, history of HF and history of COPD

<sup>c</sup> Adjusted for systolic blood pressure

<sup>d</sup> Adjusted for respiratory rate

**Supplementary Table 7:** Variables associated with all-cause mortality during follow-up for AHF patients (n=143)

|                              | <i>HR</i> | <i>95% CI</i> |
|------------------------------|-----------|---------------|
| <i>Univariate</i>            |           |               |
| NEWS2 score                  | 1.12      | 1.03 - 1.22   |
| Age                          | 1.04      | 1.02 - 1.07   |
| Male sex                     | 0.53      | 0.32 - 0.86   |
| BMI                          | 0.94      | 0.89 - 0.99   |
| Smoking                      | 0.88      | 0.48 - 1.62   |
| NYHA class IV                | 2.01      | 1.23 - 3.29   |
| <i>History of:</i>           |           |               |
| HF                           | 1.43      | 0.86 - 2.38   |
| AF                           | 1.07      | 0.66 - 1.74   |
| COPD                         | 1.85      | 1.14 - 3.01   |
| CAD                          | 1.05      | 0.65 - 1.70   |
| HT                           | 0.83      | 0.51 - 1.36   |
| DM                           | 1.78      | 1.08 - 2.95   |
| lnhs-cTnT                    | 1.37      | 1.10 - 1.71   |
| lnNT-proBNP                  | 1.53      | 1.24 - 1.89   |
| lnCRP                        | 1.32      | 1.07 - 1.62   |
| lneGFR                       | 0.39      | 0.22 - 0.66   |
| Multivariable (backward: LR) |           |               |
| DM                           | 2.26      | 1.31 - 3.87   |
| lnNT-proBNP                  | 1.46      | 1.17 - 1.83   |
| Male sex                     | 0.54      | 0.33 - 0.89   |
| COPD                         | 2.72      | 1.60 - 4.61   |
| lneGFR                       | 0.51      | 0.28 - 0.92   |

*Abbreviations as described in Supplementary Table 1.*



**Supplementary Table 8:** Comparison of AUCs for prognostic models

| <i>Model</i> | <i>Cohort</i> | <i>Variables</i>          | <i>AUC (95% CI)</i> | <i>p</i>           |
|--------------|---------------|---------------------------|---------------------|--------------------|
| 1            | All patients  | NEWS2                     | 0.64 (0.58-0.71)    |                    |
| 2            | All patients  | hs-cTnT                   | 0.69 (0.64-0.75)    | 0.22 <sup>a</sup>  |
| 3            | All patients  | NT-proBNP                 | 0.67 (0.61-0.73)    | 0.64 <sup>a</sup>  |
| 4            | All patients  | hs-cTnT, NT-proBNP        | 0.70 (0.64-0.75)    |                    |
| 5            | All patients  | hs-cTnT, NT-proBNP, NEWS2 | 0.72 (0.66-0.78)    | 0.042 <sup>b</sup> |
| 6            | AHF           | hs-cTnT, NT-proBNP        | 0.67 (0.58-0.76)    |                    |
| 7            | AHF           | hs-cTnT, NT-proBNP, NEWS2 | 0.70 (0.60-0.78)    | 0.014 <sup>c</sup> |
| 8            | AHF           | NEWS2                     | 0.65 (0.56-0.74)    |                    |
| 9            | HFrEF         | NEWS2                     | 0.56 (0.43-0.68)    |                    |
| 10           | HFpEF         | NEWS2                     | 0.80 (0.68-0.93)    | 0.005 <sup>d</sup> |

Reference model compared with: <sup>a</sup> Model 1; <sup>b</sup> Model 4; <sup>c</sup> Model 6; <sup>d</sup> Model 9

**Supplementary Figure:** Survival curves for AHF patients stratified by NEWS2 clinical risk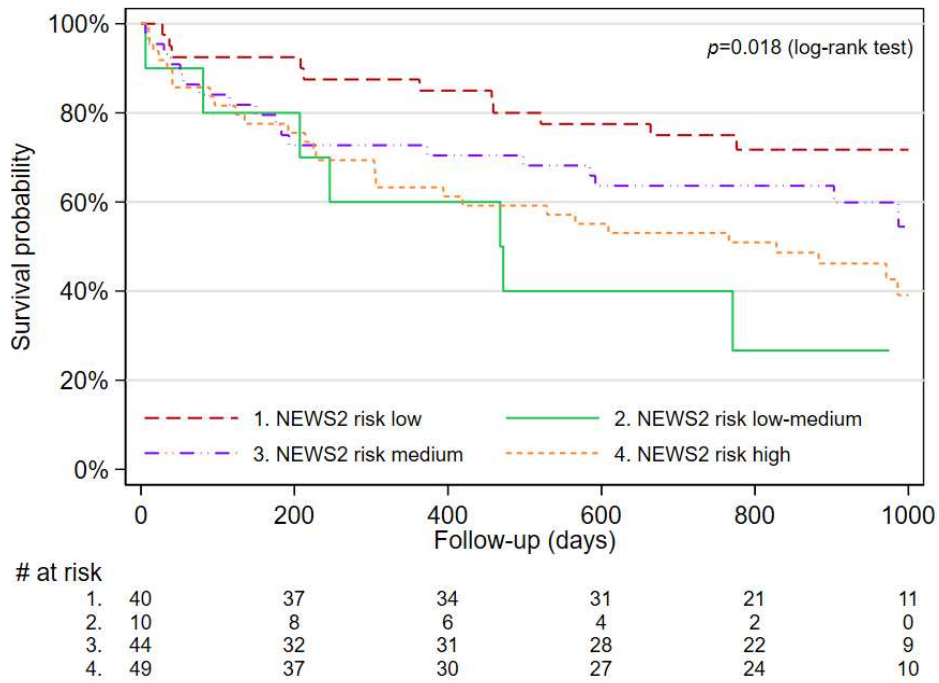

Supplement: openhrt-2021-001938supp001_data_supplement.pdf [file openhrt-2021-001938supp001_data_supplement.pdf]
